# Supplementary material
Source: publisher figshare collection journal article supplement (https://karger.figshare.com/ndownloader/files/17783705)
Supplement: Supplementary file 1 [file 17783705]

**Appendix**.

**Appendix 1**. Distribution of the countries in the WHO EUR Region according to 2017 World Bank income grouping.


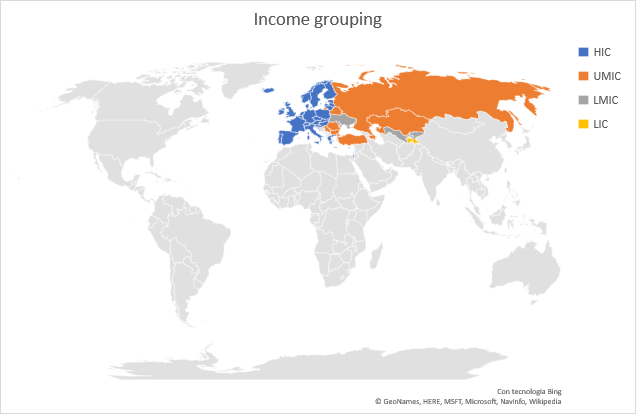
HIC, high- income; UMIC, upper- middle; LMIC, lower- middle; LIC, low-income.

**Appendix 2**. Public insurance coverage of the population in European Countries. Note that hybrid systems may be present in some countries when the coverage is under 100%.


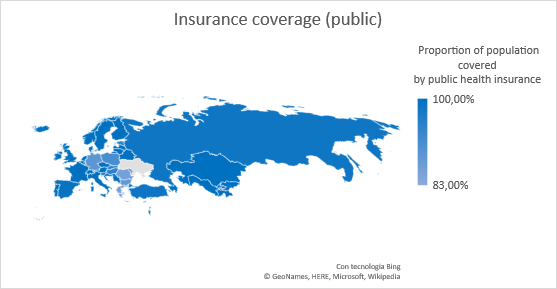


**Source**: WHO EURO. Medicines reimbursement policies in Europe (2018). Available at: <http://www.euro.who.int/__data/assets/pdf_file/0011/376625/pharmaceutical-reimbursement-eng.pdf?ua=1> (last Access: 26 June 2019)

**Appendix 3**. Priority medicines for breast cancer treatment, according to 20th WHO EML and informed by ESMO MCBS v1.1.

| **20th WHO EML** | |
| --- | --- |
| **Pharmacological class** | **Medicine(s)** |
| Cytotoxic chemotherapy agents | Capecitabine, carboplatin, cyclophosphamide, docetaxel, doxorubicin, 5-Fluorouracil, methotrexate, paclitaxel, vinorelbine |
| Anti- Hormones | Aromatase inhibitors, GnRH agonists, tamoxifen |
| Biologic agents | Trastuzumab |
| **ESMO MCBS v1.1** | |
| **Score** | **Medicine(s)** |
| Advanced/ metastatic: 5 or 4 | - *First line*: pertuzumab - *Second line and beyond*: palbociclib (plus fulvestrant), T-DM1 |
| Advanced/ metastatic: ≤3 | Bevacizumab, eribulin, everolimus, lapatinib, palbociclib (plus letrozole), ribociclib (plus letrozole) |

MCBS v1.1 (last access 27 June 2019).

WHO EML, World Health Organization Essential Medicine List. ESMO MCBS, European Society for Medical Oncology Magnitude of Clinical Benefit Scale. GnRH (or LHRH), gonadotropin- releasing hormone. T-DM1, trastuzumab emtansine.
